# Supplementary material
Source: MDPI journal article supplement (https://www.mdpi.com/2227-9709/10/2/35)
Supplement: s1 [file s1]

# The need of health informatics training for medical doctors in Jordan

This survey aims to:

- 1- Investigate to what extent medical doctors use biomedical informatics systems and applications in Jordan.
- 2- Explore if medical doctors require extra training to use biomedical informatics systems and applications in Jordan.

This survey consists of 12 multiple choice/checkbox short questions, it will take 3 minutes to answer.

The survey results will be part of a research project implemented by Dr. Shefa Tawalbeh, Dr. Lina al-ibbini, Dr. Ahmed Al-Omari, and Dr. Hiam Alquran from the biomedical systems and informatics engineering department at Yarmouk University, Ghaith Salameh, and Yousef Obeidat from Electronic Health Solutions company- Amman-Jordan.

In this survey, biomedical informatics systems and applications are any computer application/system used to assist medical staff to perform their medical practice; such as electronic medical records, medical imaging software, data analysis tools, telemedicine systems, decision-making software, etc.

## 1. Please specify your academic qualification \*

- ☐ Bachelor in medicine (MD)
- ☐ MD with specialization
- ☐ MD with subspecialization
- ☐ Other

2. Gender \*

- ☐ Male
- ☐ Female

3. Years of experience form your first degree \*

- ☐ 1-5 years
- ☐ 5-10 years
- ☐ 10-20 years
- ☐ more than 20

4. Work place \*

- ☐ Private clinic
- ☐ Governmental hospital
- ☐ Private hospital
- ☐ A university hospital
- ☐ Governmental medical center
- ☐ University or an academic institution
- ☐ Research center
- ☐ other

5. Most of your time is spent in \*

- ☐ research
- ☐ clinical practice
- ☐ academia
- ☐ equally distributed between academia, research, and clinical practice

6. Did you take previous training on health information systems \*

- ☐ Yes
- ☐ No
- ☐ Maybe

7. To what extent do you use biomedical informatics applications and systems in your daily medical practice \*

- ☐ High
- ☐ Medium high
- ☐ Medium
- ☐ Medium low
- ☐ Low

8. Which of the following do you use in your daily work: (choose one or more) \*

- ☐ Biomedical informatics applications (such as data analysis software, image processing software, etc.)
- ☐ Biomedical informatics systems (such as remote monitoring systems, telemedicine systems, etc.)
- ☐ Biomedical informatics tools (such as electronic medical records, patient portal, etc.)

9. To what extent do you need extra knowledge and/or technical training to deal with biomedical informatics systems and applications \*

- ☐ High
- ☐ Medium high
- ☐ Medium
- ☐ Medium low
- ☐ Low

10. To what extent do you need extra knowledge and/or technical training to analyze biomedical data for research purposes \*

- ☐ High
- ☐ Medium high
- ☐ Medium
- ☐ Medium low
- ☐ Low

11. To what extent do you need extra knowledge and/or technical training related to healthcare management (where this includes the administration and management in all aspects of the healthcare systems including budget, staffing, and records.) \*

- ☐ High
- ☐ Medium high
- ☐ Medium
- ☐ Medium low
- ☐ Low

12. Which of the following training courses do you prefer to increase your knowledge and practical experience in biomedical informatics systems and applications \*

- ☐ Biomedical data analysis
- ☐ Artificial intelligence in medicine
- ☐ Recent advances in electronic medical records
- ☐ Health care management systems
- ☐ Health Information System
- ☐ Cyber Security – Patient data security and privacy
- ☐ Business Intelligence

---

This content is neither created nor endorsed by Microsoft. The data you submit will be sent to the form owner.
